# Supplementary material for: Comparison of four different hematocrit assays and the effect of albumin on their measurements
Source: Front Vet Sci. 2022 Aug 24;9:937328. doi: 10.3389/fvets.2022.937328 (PMC9449412; doi:10.3389/fvets.2022.937328)
Supplement: Supplementary file 1 [file Data_Sheet_1.xlsx]

## Sheet: All data
Patient number	Date			Istat Na	Istat K	Istat Hct	Istat Hg	Heska Hct	Hesak Plt	Heska WBC	Heska Na	Heska Cl	Heska Alb	Antech Hct	Antech Na	Antech Cl	Antech K	Antech Albumin	Manual Hct	TS	comments
54193	5/22/12			141	4.5	11	37							15	143	107		26	15	6.1
53874	5/22/12			137	4.4	42		40.9	427	12.4									41	8.1
49992	5/25/12			144	4	46	156	41.9	386	17.7									43	7.1
52285	5/28/12			143	3.7	44	150	40.6	650	16.9									41	7.3
54251	5/27/12			142	4.7	34	116	44.4	186	7.3	140		40						35	5.9
54049	5/29/12			142	4	58	197							57	147	111		42	56	7.6
54289	5/29/12			160	4.3	50	170	51	226	13.5	160		47						50	7.7
54311	5/31/12			143	4.2	39	133							40	145	106		35	38	8.2
44472	5/31/12			146	3.6	46	156							36	145	114		29	40	5.5
54336	2012-02-06			111	5.3	61	207	58.8	316	12.9	113		38						63	6.3
54358	2012-04-06			145	3.8	49	167	44.2	276	8.8	138		46						51	8.7
48612	2012-08-06			147	3.6	49	167	47.2	328	9.1					144	111	4.4	37	48	6.5
54219	2012-06-06			148	3.8	52	177	48.7	263	8.5	146		43						53	6.5
54448	2012-12-06			145	3.7	48	163							47	146	110	4.3	35	43	7.4
31321	8/24/2012			139	3.1	52	177							44	142	110	4.2	28	44	7.9
31128	2012-04-09			142	3.2	53	180	55.5	320	10.7	138		39						56	7.6
43211	2012-06-26			143	3.4	44	15							40	148		4.1	41	46	8
59097	2012-06-29			148	4.3	22	7.2							26				32	24	6.2
59553	2012-07-19			137	3.9	36	12.2							39	143		4.6	52	39	6
Kobe Keith	2012-08-02			136	3.6	33	11.2							33	141		4	27	36	6
59985	2012-08-07			151	4.3	48	16.3							50	151		4.8	31	49	8.6
60341	2012-08-19			141	3.9	53	18							52	144		4.6	37	55	7.7
60796	2012-09-06			144	4.4	57	19.4							58	147		5.4	22	61	4
60798	2012-09-07			142	3.9	49	16.7							45	145		4.3	31	52	6.6
61079	2012-09-17			139	3.5	33	11.2							34	149		3.9	36	39	8
60949	2012-09-18			138	4	32	10.9							34	140		4.2	27	37	6
50757	2012-09-18			141	4.3	40	13.6							40	145		4.9	22	45	7.2
61367	2012-09-29			143	3.5	39	13.3							34	145		4.1	35	42	6.6
61367	2012-09-29			145	3.6	40	13.6							34	145		4.1	35	42	6.6
61389	2012-10-01			140	4.8	30	10.2							30	147		4.7	28	35	6.4
61856	2012-10-19			145	4.2	56	19							52	151		4.9	36	58	7.8
52121	2013-10-26			150	4	64	21.8							64	149		5	35	65	7.6
30041	2013-11-09			142	4.1	47	16							48	152		4.7	29	51	6.6
62021	2013-10-26			157	3.7	36	12.2							37	157		4	37	33	8.5
62352	2013-11-09			146	3	56	19							51	150		3.5	34	59	7.6
62460	2013-11-14			143	3.6	52	17.7							49	144		4	36	55	8.1
62645	2013-11-23			142	4.5	14	4.8							14	143		4.7	33	16	7.2
18901	2013-11-23			146	4.2	52	17.7							54	148		4.6	39	54	8.5
62719	2013-11-28			145	3	56	19							58	147		3.7	36	58	7.4
								LaserCyte
Rollie Walz	2013-12-22			151	4	63	21.4	63	720	9.2			37						63	9.4
Abby Willett	2013-12-21			149	3.3	35	11.9							34	149	113	3.7	34	38	7.8
Dixie Wallace	2014-01-06			141	3.7	68	23.1							64	144	98	4.2	42	73	10.5
Puzzle Bain	2014-01-01			146	4.8	46	15.6	81.5	2500	12.15			32						50	6.8
Keiko Johnson	2014-01-09			146	4.3	73	24.8							65	144	113	5.6	23	78	4.9
Frank Farran	2014-01-02			137	3.2	45	15.3							45	141	100	4.1	27	47	5.8
Malina Trembecki	2014-01-19			140	3.7	57	19.4	55.4	221	11.48			25						60	5.4
Crawford Coakley	2014-01-18			138	3.3	42	14.3	44.3	241	29.87			10						47	3.8
Coco 71495	2014-01-19			141	3.4	49	16.7	51	223	9.31				50	143	107	4.1	30	52	6.7
Jessie James Giesbers	2014-01-20			148	3.6	34	11.6							33	148	117	4.8	11	37	3
Loki Torry	2014-01-25			144	3.4	46	15.6							46	148	105	4.1	41	49	7.6
Murphy Boisclair	2014-01-25			143	3.9	54	18.4							45				32	56	11.2
Remy MacDonald	2014-01-25			144	3.3	44	15							44	144	110	3.9	35	47	7.2
Sasha Neumann	2014-01-29			145	3.2	25	8.5	27	62	6.26			13						28	11
Mike Grant	2014-01-30			150	3.8	52	17.7							54	150	117	4.4	34	55	6.4
Cairo Bell	2014-02-03			145	2.8	48	16.3							48	148	111	3.4	37	52	7.3
Riko Sydnoruk	2014-02-04			143	3.4	44	15							43	146	111	4.5	36	49	7.6
Amelia Langton	2014-02-01			144	4.1	48	16.3	42.6	349	8.29			31						52	7.6
Kira Carver	2014-02-01			144	4	42	14.3	40.2	148	8.37			31						43	6.6
Cheech Do	2014-02-09			147	3.6	53	18	48.9	214	7.5			32						50	7.2
Brandy Parry	2014-02-16			144	3.4	49	16.7	44.9	396	20.2			26						51	8
Cassie Petersen	2014-02-17			146	4	38	12.9							39	145	114	4.7	29	43	6.2
Fender Millan	2014-02-14			139	4.2	49	16.7							48	144	110	5.4	31	54	6
Rocky Hill	2014-02-09			146	3.8	35	11.9							38	150	117	4.3	37	40	8
Harley Shepherd	3014-03-01			138	3.2	59	20.1	59	323	19.88			38						65	8.4
Buddy Vahey	2014-03-30			143	3.4	48	16.3	48	321	28.43			33						50	4.7
Casey Sanderson	2014-03-08			139	3.7	31	10.5	31.4	266	12.22			36						38	6.6
Brooke Sassano	2014-03-16			133	3.5	36	12.2	38.2	212	8.04			30								No PCV
Shredder Morgan	2014-04-24			150	3.7	44	15							50	148	122	4.7	18	48	3.8
May Seimans	2014-04-22			148	3.8	40	13.6							43	149	120	4.3	34	47	6.2
Ernie Wallace	2014-05-12			148	4.8	11	3.7							10	151	116	4.5	15	11	4.2
Maggie Tarp	2014-05-18			145	3.9	42	14.3	42.4	283	11.09			40						44	7.2
Koko Weatherbee	2014-06-24			145	3.9	41	13.9							45	145	119	4.7	20	15	3.8
Milo Haine	2014-06-25			144	3.8	37	12.6							38	144	114	4.5	25	41	6.2

## Sheet: CARE
Patient number	date	sample number	Istat Na+	Istat K+	Istat Hct	Istat Hb	Antech Hct	Antech Na+	Antech K	Antech Albumin	Manual Hct	Total Solids	comments
43211	2012-06-26		143	3.4	44	15	40	148	4.1	41	46	8
59097	2012-06-29		148	4.3	22	7.2	26			32	24	6.2	pre-op only
59553	2012-07-19		137	3.9	36	12.2	39	143	4.6	52	39	6
Kobe Keith	2012-08-02		136	3.6	33	11.2	33	141	4	27	36	6
59985	2012-08-07		151	4.3	48	16.3	50	151	4.8	31	49	8.6
60341	2012-08-19		141	3.9	53	18	52	144	4.6	37	55	7.7
60796	2012-09-06		144	4.4	57	19.4	58	147	5.4	22	61	4
60798	2012-09-07		142	3.9	49	16.7	45	145	4.3	31	52	6.6
61079	2012-09-17		139	3.5	33	11.2	34	149	3.9	36	39	8
60949	2012-09-18		138	4	32	10.9	34	140	4.2	27	37	6
50757	2012-09-18		141	4.3	40	13.6	40	145	4.9	22	45	7.2
61367	2012-09-29		143	3.5	39	13.3	34	145	4.1	35	42	6.6
61367	2012-09-29		145	3.6	40	13.6	34	145	4.1	35	42	6.6
61389	2012-10-01		140	4.8	30	10.2	30	147	4.7	28	35	6.4
61856	2012-10-19		145	4.2	56	19	52	151	4.9	36	58	7.8
52121	2013-10-26		150	4	64	21.8	64	149	5	35	65	7.6
30041	2013-11-09		142	4.1	47	16	48	152	4.7	29	51	6.6
62021	2013-10-26		157	3.7	36	12.2	37	157	4	37	33	8.5
62352	2013-11-09		146	3	56	19	51	150	3.5	34	59	7.6
62460	2013-11-14		143	3.6	52	17.7	49	144	4	36	55	8.1
62645	2013-11-23		142	4.5	14	4.8	14	143	4.7	33	16	7.2
18901	2013-11-23		146	4.2	52	17.7	54	148	4.6	39	54	8.5
62719	2013-11-28		145	3	56	19	58	147	3.7	36	58	7.4

## Sheet: Western
Patient number	date	sample number	fluid therapy	Istat Na	Istat K	Istat Hct	Istat Hg	Heska Hct	Hesak Plt	Heska WBC	Heska Na	Heska Cl	Heska Alb	Antech Hct	Antech Na	Antech Cl	Antech K	Antech Albumin	Manual Hct	TS	comments
54193	5/22/12	1		141	4.5	11	37							15	143	107		26	15	6.1
53874	5/22/12	1		137	4.4	42		40.9	427	12.4									41	8.1
49992	5/25/12	1		144	4	46	156	41.9	386	17.7									43	7.1
52285	5/28/12	1		143	3.7	44	150	40.6	650	16.9									41	7.3
54251	5/27/12	1		142	4.7	34	116	44.4	186	7.3	140		40						35	5.9
54049	5/29/12	1		142	4	58	197							57	147	111		42	56	7.6
54289	5/29/12	1		160	4.3	50	170	51	226	13.5	160		47						50	7.7
54311	5/31/12	1		143	4.2	39	133							40	145	106		35	38	8.2
44472	5/31/12	1		146	3.6	46	156							36	145	114		29	40	5.5
54336	2012-02-06	1		111	5.3	61	207	58.8	316	12.9	113		38						63	6.3
54358	2012-04-06	1		145	3.8	49	167	44.2	276	8.8	138		46						51	8.7
48612	2012-08-06	1		147	3.6	49	167	47.2	328	9.1					144	111	4.4	37	48	6.5
54219	2012-06-06	1		148	3.8	52	177	48.7	263	8.5	146		43						53	6.5
54448	2012-12-06	1		145	3.7	48	163							47	146	110	4.3	35	43	7.4
31321	8/24/2012	1		139	3.1	52	177							44	142	110	4.2	28	44	7.9
31128	2012-04-09	1		142	3.2	53	180	55.5	320	10.7	138		39						56	7.6
